# Supplementary material for: Genetic Architecture of Capitate Glandular Trichome Density in Florets of Domesticated Sunflower (Helianthus annuus L.)
Source: Front Plant Sci. 2018 Jan 9;8:2227. doi: 10.3389/fpls.2017.02227 (PMC5767279; doi:10.3389/fpls.2017.02227)
Supplement: Supplementary file 3 [file Table3.pdf]

Table S3. Summary of two-QTL scan LOD scores and genome-wide permutation threshold for full two-QTL model ( $T_f$ ), full two-QTL model over a single QTL model ( $T_{fv1}$ ), additive model ( $T_a$ ), interaction model ( $T_i$ ), additive model over a single QTL model ( $T_{av1}$ ).

|                                                     | $T_f$ | $T_{fv1}$ | $T_a$ | $T_i$ | $T_{av1}$ |
|-----------------------------------------------------|-------|-----------|-------|-------|-----------|
| LOD threshold ( $\alpha = 0.05$ , 1000 permutation) | 10.46 | 7.57      | 7.65  | 6.32  | 4.6       |
| Ha5@14.6 : Ha6@60.5 two QTL scan                    | 11.9  | 5.86      | 10.8  | 1.1   | 4.76      |
