# Supplementary material for: Genetic Architecture of Capitate Glandular Trichome Density in Florets of Domesticated Sunflower (Helianthus annuus L.)
Source: Front Plant Sci. 2018 Jan 9;8:2227. doi: 10.3389/fpls.2017.02227 (PMC5767279; doi:10.3389/fpls.2017.02227)
Supplement: Supplementary file 7 [file DataSheet1.XLSX]

## Sheet: Sheet1
Supplemental File 1. Genetic map location of 2121 SNP markers in the HA 300/RHA 464 mapping population. Physical location reference is the HA412HOv.1.1 genome assembly.
physical location (ch|bp)	genetic map location (cM)
Chr1|28504	0.028504
Chr1|7329070	0.0285041
Chr1|7521207	0.308478
Chr1|10108297	0.870676
Chr1|10116412	1.15061
Chr1|10130618	1.71265
Chr1|10131284	2.27469
Chr1|10699335	2.5547
Chr1|11340723	3.10976
Chr1|12082448	5.69307
Chr1|12082773	5.69307
Chr1|13390051	5.97972
Chr1|14669620	7.11126
Chr1|14759080	7.391
Chr1|14759190	7.67115
Chr1|16004150	7.95131
Chr1|16005702	8.23147
Chr1|16107182	8.5115
Chr1|17107663	9.07382
Chr1|17114357	9.35371
Chr1|17257078	9.91606
Chr1|20005014	10.1961
Chr1|20017432	10.4763
Chr1|21039261	10.7563
Chr1|21041953	11.3186
Chr1|21183615	11.8807
Chr1|22227261	12.1608
Chr1|22258244	12.441
Chr1|22554040	12.7211
Chr1|23540905	13.2825
Chr1|23964991	14.1291
Chr1|25486273	14.4089
Chr1|26176632	14.9712
Chr1|26225258	15.2512
Chr1|26380444	15.5311
Chr1|27797761	16.3771
Chr1|27856832	16.657
Chr1|28117994	16.937
Chr1|29259853	17.4993
Chr1|29324646	17.7793
Chr1|29855704	18.0592
Chr1|31333607	18.9054
Chr1|34161334	19.1853
Chr1|34261538	19.4648
Chr1|36328255	21.1739
Chr1|36329553	21.4534
Chr1|37884675	21.7334
Chr1|38417205	22.2958
Chr1|38462348	22.5759
Chr1|38871163	22.856
Chr1|38878927	23.4168
Chr1|39155046	24.5501
Chr1|40189970	24.8299
Chr1|40386406	25.1101
Chr1|41213046	25.3903
Chr1|42432717	25.6705
Chr1|42604275	25.9504
Chr1|42604346	26.7967
Chr1|43837849	27.0766
Chr1|44212993	27.3568
Chr1|45761639	27.6368
Chr1|46171931	28.1988
Chr1|46177973	29.0448
Chr1|48181577	29.3245
Chr1|48603179	29.8868
Chr1|48934737	30.1668
Chr1|49270918	30.447
Chr1|49272375	30.7271
Chr1|50078619	31.0072
Chr1|50188634	31.2874
Chr1|51100912	31.5675
Chr1|52415313	31.8476
Chr1|52418103	32.4098
Chr1|54626177	32.6898
Chr1|54693915	32.97
Chr1|55867342	33.2501
Chr1|55868566	33.5303
Chr1|55915272	33.8102
Chr1|57783496	34.6565
Chr1|57783580	34.9364
Chr1|58021099	35.2166
Chr1|58194738	35.4968
Chr1|59398475	35.777
Chr1|59605322	36.0572
Chr1|59682701	36.3371
Chr1|60520994	37.1829
Chr1|63610387	38.3145
Chr1|63610458	38.5942
Chr1|64381974	38.8744
Chr1|64648042	39.1546
Chr1|64648233	39.4345
Chr1|65095862	40.2808
Chr1|65265169	40.5607
Chr1|66644296	40.8409
Chr1|67400709	41.1208
Chr1|67406709	41.9672
Chr1|67829264	42.2465
Chr1|68046374	43.6663
Chr1|68361224	43.9459
Chr1|69352809	44.2261
Chr1|72728466	44.5063
Chr1|73656159	44.7865
Chr1|73854190	45.0667
Chr1|73875907	45.3468
Chr1|75172808	45.627
Chr1|75174551	45.9072
Chr1|75787388	46.1872
Chr1|76126663	46.7496
Chr1|76860128	47.0296
Chr1|76905223	47.3095
Chr1|76911216	48.1557
Chr1|77081547	48.4356
Chr1|78421386	48.7157
Chr1|78624844	48.9959
Chr1|79156090	49.2759
Chr1|79911243	49.8383
Chr1|80451349	50.1182
Chr1|81608034	50.6806
Chr1|81608719	50.9606
Chr1|81853663	51.2408
Chr1|82121680	51.8031
Chr1|82121701	52.0832
Chr1|82121708	52.3634
Chr1|83598994	52.6437
Chr1|83858253	52.9239
Chr1|84587568	53.2038
Chr1|85145268	54.0504
Chr1|85670725	54.3304
Chr1|86606363	54.5856
Chr2|79510	0.07951
Chr2|2822717	0.0795101
Chr2|2858463	0.64167
Chr2|3384464	1.20328
Chr2|4058671	1.76524
Chr2|4735790	2.04386
Chr2|5179503	5.22164
Chr2|5616484	5.50026
Chr2|5672538	6.11341
Chr2|5672659	6.11341
Chr2|5879297	8.06241
Chr2|6648918	8.62043
Chr2|7240147	9.17825
Chr2|8153136	11.1768
Chr2|8180111	15.5694
Chr2|8188754	16.1295
Chr2|8557198	16.4095
Chr2|8557321	16.9716
Chr2|8592086	17.2516
Chr2|8965433	17.808
Chr2|9038564	20.1037
Chr2|9099749	20.3827
Chr2|9647235	20.9447
Chr2|11056898	22.076
Chr2|12036864	23.207
Chr2|12038135	23.4863
Chr2|12045024	24.6189
Chr2|12766650	25.1795
Chr2|12809083	25.779
Chr2|12809160	25.779
Chr2|14199442	28.0347
Chr2|15122468	28.5912
Chr2|15159170	29.1533
Chr2|16062426	29.4324
Chr2|17098176	31.723
Chr2|18937302	32.0022
Chr2|20337277	32.2822
Chr2|20486617	32.8443
Chr2|21730557	33.1233
Chr2|21893839	35.7085
Chr2|22049170	37.0922
Chr2|22138384	46.8043
Chr2|24823616	47.258
Chr2|28459225	48.1047
Chr2|28808701	48.3846
Chr2|29864917	48.6647
Chr2|30466232	48.9449
Chr2|30566542	49.2235
Chr2|30875418	52.7052
Chr2|31003516	52.9838
Chr2|32032706	53.264
Chr2|32981428	53.5439
Chr2|33466291	54.39
Chr2|33688741	54.6699
Chr2|34159545	54.9501
Chr2|34347243	55.2303
Chr2|34929917	55.5103
Chr2|35467315	56.0726
Chr2|35691304	56.3525
Chr2|36156281	56.9148
Chr2|36195807	57.1947
Chr2|37284378	57.757
Chr2|38052637	58.0369
Chr2|38641864	58.5992
Chr2|38690401	58.8792
Chr2|40033572	59.1594
Chr2|41056923	59.4395
Chr2|41260834	59.7197
Chr2|43718668	59.9989
Chr2|45043687	62.2898
Chr2|45046320	63.7085
Chr2|45251763	63.9882
Chr2|45432186	64.2684
Chr2|46086002	64.5486
Chr2|47075268	64.8288
Chr2|49076830	65.1086
Chr2|49359183	66.2408
Chr2|50913550	66.8028
Chr2|51184200	67.0829
Chr2|51184230	67.3631
Chr2|51407795	67.6432
Chr2|52328968	68.2058
Chr2|52449718	68.4859
Chr2|52512479	68.7661
Chr2|52564763	69.0463
Chr2|53606442	69.3266
Chr2|55145855	69.6068
Chr2|55242821	69.887
Chr2|55909201	70.1673
Chr2|57013441	70.4473
Chr2|57950417	71.0098
Chr2|58120124	71.572
Chr2|58234591	72.1344
Chr2|58480185	72.4142
Chr2|61235924	73.261
Chr2|61279957	73.5409
Chr2|62616329	73.8211
Chr2|62624054	74.1012
Chr2|62652753	74.6637
Chr2|62857706	75.2261
Chr2|65354172	75.5062
Chr2|65531694	75.7862
Chr2|65817686	76.6331
Chr2|66710144	76.913
Chr2|68141581	77.1931
Chr2|68259501	77.7557
Chr2|69038663	78.0355
Chr2|70100399	78.8823
Chr2|72136826	79.1623
Chr2|73284405	79.4425
Chr2|73744323	79.7227
Chr2|74212150	80.0029
Chr2|74345622	80.2831
Chr2|75225134	80.5634
Chr2|75225236	80.8436
Chr2|76019684	81.1238
Chr2|77096879	81.404
Chr2|78243576	81.6842
Chr2|78836257	81.9645
Chr2|78846495	82.2447
Chr2|79304644	82.5249
Chr2|79816080	82.8051
Chr2|80342742	83.0853
Chr2|80698977	83.3654
Chr2|80889473	83.9279
Chr2|82035524	84.208
Chr2|82279657	84.4882
Chr2|82808967	84.7685
Chr2|83387791	85.0485
Chr2|84823750	85.6111
Chr2|85730758	85.8911
Chr2|86734686	86.1714
Chr2|87940239	86.4516
Chr2|88735533	86.7318
Chr2|88839840	87.0121
Chr2|89160943	87.2923
Chr2|89932430	87.5725
Chr2|91263078	87.8526
Chr2|92419816	88.414
Chr2|92699527	91.0119
Chr2|93111906	91.5649
Chr2|95541904	92.9875
Chr2|95749895	93.2669
Chr2|96809879	94.1135
Chr2|97162796	94.6757
Chr2|100941811	94.9558
Chr2|102161387	95.2357
Chr2|103958106	96.0802
Chr2|104173333	96.3101
Chr3|19162	0.019162
Chr3|2277973	0.0191621
Chr3|3624038	0.299201
Chr3|3916321	0.861119
Chr3|4509852	1.39352
Chr3|4542858	6.75733
Chr3|4604119	7.28835
Chr3|4873173	8.41827
Chr3|5022036	10.1252
Chr3|5225278	10.4046
Chr3|6007702	10.6842
Chr3|6109998	12.1042
Chr3|6456481	12.664
Chr3|6716366	13.2256
Chr3|6814545	13.7881
Chr3|8154137	14.3499
Chr3|8550299	14.6298
Chr3|9454897	15.1922
Chr3|9687958	15.7539
Chr3|10182445	16.3145
Chr3|10930427	17.4477
Chr3|11716499	18.0062
Chr3|12058028	19.4281
Chr3|12611833	19.9865
Chr3|14056806	21.1174
Chr3|14056817	23.1152
Chr3|14765331	25.1138
Chr3|16427655	25.392
Chr3|16445758	27.9858
Chr3|17892113	28.5408
Chr3|18043718	29.103
Chr3|18281358	29.3818
Chr3|19501449	32.2663
Chr3|19505814	32.5444
Chr3|23087517	34.2521
Chr3|25086785	35.383
Chr3|25102227	36.2288
Chr3|27475215	36.5084
Chr3|27475642	37.3547
Chr3|27550764	37.6347
Chr3|28290978	37.9149
Chr3|28802175	38.195
Chr3|29634435	38.7573
Chr3|29791840	39.0361
Chr3|30205710	41.9208
Chr3|30257597	43.6296
Chr3|30750204	44.1914
Chr3|31014148	44.7529
Chr3|32406442	47.0496
Chr3|33482816	47.3288
Chr3|34281913	47.609
Chr3|34819263	47.8888
Chr3|34819386	49.0212
Chr3|35282032	49.3007
Chr3|36427052	50.1471
Chr3|37245178	50.992
Chr3|39286962	52.124
Chr3|39580273	52.4038
Chr3|40247105	52.684
Chr3|40283224	52.9641
Chr3|41532295	53.5263
Chr3|44762088	54.0886
Chr3|45036053	54.3686
Chr3|45039220	54.6484
Chr3|45044916	55.7806
Chr3|45465575	56.0604
Chr3|45850365	56.3403
Chr3|48016017	57.1866
Chr3|48050601	58.0329
Chr3|49104430	58.3128
Chr3|49104543	58.593
Chr3|49147038	58.8732
Chr3|49147644	59.1534
Chr3|50071192	59.4336
Chr3|51052609	59.7138
Chr3|52198362	59.994
Chr3|54091795	60.2741
Chr3|54344010	60.5543
Chr3|55602002	60.8345
Chr3|56220719	61.1147
Chr3|57095828	61.3949
Chr3|59445692	61.6749
Chr3|59668370	62.2374
Chr3|60904285	62.5174
Chr3|61303153	62.7976
Chr3|63018293	63.0776
Chr3|63691792	63.9227
Chr3|64485167	64.2026
Chr3|65503193	64.4813
Chr3|66599763	64.4813
Chr3|69867275	64.4813
Chr3|69879436	64.7615
Chr3|69885520	65.0416
Chr3|70393522	65.6042
Chr3|70508870	65.8842
Chr3|72653550	66.4467
Chr3|72879219	66.7268
Chr3|73240793	67.0068
Chr3|73590374	67.8531
Chr3|75002573	68.9855
Chr3|76205321	69.2645
Chr3|76206249	71.2676
Chr3|76267401	72.1137
Chr3|76369179	72.6762
Chr3|76519785	72.9563
Chr3|76566666	73.2366
Chr3|77314857	73.5169
Chr3|77910055	73.7972
Chr3|78592183	74.0775
Chr3|80823306	74.3573
Chr3|80823317	75.779
Chr3|80986238	76.3411
Chr3|81529568	76.6213
Chr3|81605630	76.9015
Chr3|82369711	77.1818
Chr3|83613748	77.462
Chr3|84284502	77.7423
Chr3|85729919	78.0224
Chr3|86097801	78.5849
Chr3|86097884	79.1474
Chr3|87856411	79.4275
Chr3|87856874	79.7077
Chr3|87981564	79.988
Chr3|90110501	80.2682
Chr3|90867127	80.5439
Chr3|94067883	80.8242
Chr3|94067922	81.0997
Chr3|94074464	81.6807
Chr3|97121505	81.9791
Chr3|97282203	82.2592
Chr3|98424854	82.8218
Chr3|99101183	83.1019
Chr3|100207814	83.3821
Chr3|100213501	83.6374
Chr4|18843	0.018843
Chr4|1010682	0.258078
Chr4|1232041	0.819352
Chr4|3110593	3.10817
Chr4|3630529	5.40224
Chr4|5419631	5.95793
Chr4|5419714	6.804
Chr4|5420549	7.36618
Chr4|5530766	7.92788
Chr4|5722474	8.2077
Chr4|5722869	9.053
Chr4|6132355	10.1852
Chr4|6793600	10.7462
Chr4|6850927	11.1119
Chr4|6852249	23.0259
Chr4|6852329	27.7081
Chr4|6859947	30.5885
Chr4|7183355	31.7162
Chr4|8234038	32.277
Chr4|8578522	32.7977
Chr4|9446712	39.1239
Chr4|9511154	40.5299
Chr4|9585397	41.0898
Chr4|11025716	41.3697
Chr4|12395281	41.932
Chr4|15262423	42.212
Chr4|16069340	42.4917
Chr4|16076412	43.6235
Chr4|16076669	43.9032
Chr4|20119030	44.1831
Chr4|20724560	45.0298
Chr4|20884034	45.5913
Chr4|20892636	45.8712
Chr4|25016330	46.4329
Chr4|25016359	48.0636
Chr4|25016452	48.0636
Chr4|25127933	48.701
Chr4|27547069	48.981
Chr4|27547130	49.2606
Chr4|28208061	50.6796
Chr4|28277427	51.2413
Chr4|30612048	51.5212
Chr4|32057651	52.0831
Chr4|32780870	53.2146
Chr4|32820693	53.4941
Chr4|34720395	54.3397
Chr4|36469308	54.9014
Chr4|37555942	55.7469
Chr4|40024516	56.0266
Chr4|46099509	56.5883
Chr4|46758714	58.0063
Chr4|46877891	58.2859
Chr4|49075947	58.5649
Chr4|51130160	59.4109
Chr4|51130577	59.9728
Chr4|52550846	60.8186
Chr4|54264036	61.0984
Chr4|55608025	61.6606
Chr4|57841527	61.9407
Chr4|58210546	62.2204
Chr4|63309706	63.3516
Chr4|63309835	63.6313
Chr4|65150704	63.911
Chr4|68113503	65.0422
Chr4|68113601	65.6039
Chr4|68133986	66.166
Chr4|74505337	66.446
Chr4|74919659	67.0081
Chr4|75456752	67.2882
Chr4|76656140	67.5684
Chr4|78120838	67.8484
Chr4|78165187	68.4106
Chr4|80112362	68.6901
Chr4|80112401	69.8215
Chr4|80184383	70.1013
Chr4|80463225	70.3813
Chr4|89285279	70.9435
Chr4|91295826	71.2234
Chr4|92100075	71.7856
Chr4|92230593	72.0655
Chr4|94128273	72.6277
Chr4|94388456	73.1898
Chr4|94391199	73.4699
Chr4|100515394	73.7501
Chr4|101288578	74.0302
Chr4|106952156	74.2604
Chr5|8842	0.008842
Chr5|1276503	0.238862
Chr5|1670253	0.796313
Chr5|1671491	1.07611
Chr5|2257625	1.92154
Chr5|2888763	2.76743
Chr5|3582986	3.32864
Chr5|3832523	3.89052
Chr5|4025353	4.4524
Chr5|4245697	5.01429
Chr5|4247112	5.5691
Chr5|4251127	8.16438
Chr5|4374707	8.71925
Chr5|5037611	8.99924
Chr5|5898190	9.55989
Chr5|7377325	10.6919
Chr5|7408603	10.9714
Chr5|8076291	11.8155
Chr5|9523295	13.5234
Chr5|9639203	13.8028
Chr5|10681681	14.3649
Chr5|11356218	14.6449
Chr5|11364059	14.925
Chr5|11465681	15.487
Chr5|12656528	15.7671
Chr5|13213034	16.0472
Chr5|13350685	16.6092
Chr5|13608009	16.8891
Chr5|13820916	17.735
Chr5|13845837	18.0145
Chr5|13846488	19.1458
Chr5|13847334	19.7079
Chr5|15218593	20.2698
Chr5|15218781	20.5498
Chr5|16118429	21.112
Chr5|17299484	21.3913
Chr5|18923945	23.3946
Chr5|19578628	23.9525
Chr5|22299255	24.2374
Chr5|22299599	24.2374
Chr5|23103498	28.6426
Chr5|23832261	29.1847
Chr5|25102390	29.7468
Chr5|26406361	30.0268
Chr5|26694833	30.5875
Chr5|30796240	31.7201
Chr5|30939664	32.5652
Chr5|30944464	33.0944
Chr5|30944506	33.0944
Chr5|33254470	33.6884
Chr5|33294031	34.5346
Chr5|33438201	34.8142
Chr5|33544367	35.6604
Chr5|38448143	35.9402
Chr5|39623377	36.5025
Chr5|39628813	36.7825
Chr5|39629201	37.2889
Chr5|39629254	44.5888
Chr5|39939428	44.8654
Chr5|40023253	45.4274
Chr5|40108535	45.9881
Chr5|40218892	47.1194
Chr5|40237354	48.5376
Chr5|40328196	49.3832
Chr5|40544117	49.6629
Chr5|41115563	50.2251
Chr5|41139942	50.5049
Chr5|41142755	51.3509
Chr5|41142800	51.6308
Chr5|42586223	51.9109
Chr5|44707568	52.1911
Chr5|48226604	52.4712
Chr5|48257531	53.0332
Chr5|49516016	53.5945
Chr5|49537736	54.4408
Chr5|49540493	54.7204
Chr5|49541838	55.5667
Chr5|50213362	56.1265
Chr5|51061545	57.2589
Chr5|51073013	57.5385
Chr5|51473369	58.1007
Chr5|51611777	58.6623
Chr5|56201574	59.7933
Chr5|57046143	60.073
Chr5|57233284	60.3532
Chr5|60794483	60.6333
Chr5|61097490	60.9126
Chr5|62072407	62.9099
Chr5|64721131	63.1891
Chr5|64935925	63.4692
Chr5|65201960	64.0314
Chr5|66095026	64.3114
Chr5|68421443	64.5891
Chr5|70264905	69.5946
Chr5|70265036	69.8725
Chr5|70367145	70.1524
Chr5|70454876	70.9991
Chr5|70823934	71.279
Chr5|73627634	71.8416
Chr5|75058198	72.1214
Chr5|75921951	72.9671
Chr5|76115324	75.2601
Chr5|76606109	76.3907
Chr5|76673617	77.2364
Chr5|76673886	77.5163
Chr5|77200574	77.7964
Chr5|79340301	78.0764
Chr5|81722498	78.6347
Chr5|82366289	82.4167
Chr5|84059359	82.6925
Chr5|85488108	83.8242
Chr5|85785289	85.2435
Chr5|88856277	85.2435
Chr5|88861145	86.9534
Chr5|88912480	87.2328
Chr5|91162126	87.7954
Chr5|91284858	88.0755
Chr5|92101921	88.3557
Chr5|93331765	88.6323
Chr5|94190847	96.2142
Chr5|94252678	96.4908
Chr5|94362656	96.771
Chr5|94600298	97.0512
Chr5|94794959	97.3314
Chr5|94976605	97.6116
Chr5|94994486	97.8917
Chr5|95503510	98.4541
Chr5|99699359	98.7342
Chr5|99877720	99.0144
Chr5|100085029	99.2946
Chr5|100085128	99.5745
Chr5|100331860	100.421
Chr5|100340500	100.7
Chr5|106385082	102.408
Chr5|106428162	102.687
Chr5|106539926	102.967
Chr5|106704923	103.247
Chr5|107771635	103.527
Chr5|112048377	104.658
Chr5|113491798	105.503
Chr5|113497280	105.783
Chr5|125491235	106.063
Chr5|125676490	106.341
Chr5|128039002	106.341
Chr5|131609419	106.901
Chr5|134832432	107.181
Chr5|135545431	107.718
Chr6|1179925	0.017402
Chr6|17402	0.0174021
Chr6|1181518	0.580798
Chr6|1485925	1.14266
Chr6|5502677	1.42258
Chr6|5753326	5.80366
Chr6|5763885	6.08361
Chr6|5972206	6.63127
Chr6|6672401	18.9462
Chr6|6490097	18.9462
Chr6|6672848	24.379
Chr6|6949576	26.6703
Chr6|7000730	27.2319
Chr6|7166407	27.7941
Chr6|7167544	28.3527
Chr6|7167580	34.3247
Chr6|7167695	34.8834
Chr6|7322750	35.4452
Chr6|7403699	37.1534
Chr6|7403744	38.8614
Chr6|7405403	39.1415
Chr6|7405498	39.7037
Chr6|7427034	40.265
Chr6|7427104	43.1506
Chr6|7427196	44.2814
Chr6|7461701	46.2805
Chr6|8267098	49.7664
Chr6|8364901	50.8677
Chr6|8588541	76.2215
Chr6|8664915	76.5004
Chr6|9043439	78.2073
Chr6|9043539	82.9153
Chr6|9411729	83.4752
Chr6|10089557	84.0372
Chr6|10089725	85.1686
Chr6|11217453	85.4488
Chr6|11465837	86.0109
Chr6|11469535	86.2911
Chr6|13477072	86.5713
Chr6|17422296	86.8515
Chr6|17440611	87.1317
Chr6|17448299	87.4118
Chr6|20243872	88.8308
Chr6|21309435	89.1109
Chr6|21928499	89.6731
Chr6|23284809	90.2352
Chr6|24105414	90.5154
Chr6|26720937	91.0775
Chr6|27125445	91.6396
Chr6|27303508	92.4856
Chr6|27899034	92.7658
Chr6|29460043	93.046
Chr6|30944415	93.3262
Chr6|32545545	93.8885
Chr6|33025499	94.1687
Chr6|33027256	94.4489
Chr6|34084321	95.0111
Chr6|35836587	95.2913
Chr6|36475645	95.5716
Chr6|37364307	95.8518
Chr6|38155042	96.132
Chr6|39238050	96.6942
Chr6|40612057	97.2563
Chr6|41646410	97.8185
Chr6|42145692	98.0987
Chr6|43123909	98.3789
Chr6|43389202	98.941
Chr6|44856470	99.5033
Chr6|46391602	100.065
Chr6|46391662	100.346
Chr6|46391713	100.626
Chr6|47292911	102.045
Chr6|49150165	102.32
Chr7|1589	0.001589
Chr7|8841425	0.0015891
Chr7|9816169	0.558901
Chr7|10423320	1.12082
Chr7|11200440	1.40087
Chr7|11200621	1.681
Chr7|11453609	1.96114
Chr7|11586343	1.96114
Chr7|14050941	2.80708
Chr7|15295072	3.36837
Chr7|17397768	3.64817
Chr7|19581531	4.49394
Chr7|20552071	4.77354
Chr7|20554467	5.61887
Chr7|20554585	5.89696
Chr7|23253988	6.74209
Chr7|23497194	7.58571
Chr7|24266807	7.86074
Chr7|26247274	8.70611
Chr7|28323155	8.98141
Chr7|28343874	9.2613
Chr7|31790040	10.1069
Chr7|31790132	10.1069
Chr7|31790145	10.9523
Chr7|32442645	11.2322
Chr7|33265654	11.5079
Chr7|33266863	12.088
Chr7|36364804	12.3817
Chr7|40464857	12.6618
Chr7|52338207	12.942
Chr7|52412990	13.2221
Chr7|54232970	13.4772
Chr8|47166	0.047166
Chr8|2064572	0.0471661
Chr8|2234849	0.604532
Chr8|2288511	1.1665
Chr8|2514607	1.44571
Chr8|2528493	3.44481
Chr8|2528627	4.28215
Chr8|3004273	7.76812
Chr8|3714096	11.2634
Chr8|4665775	11.802
Chr8|5119902	14.9973
Chr8|6012849	15.5583
Chr8|6012957	15.8383
Chr8|6012987	16.1185
Chr8|6167183	16.6804
Chr8|7313658	17.2431
Chr8|7315062	17.805
Chr8|7402054	18.0852
Chr8|8042844	18.3654
Chr8|8425828	18.6456
Chr8|8623081	18.9258
Chr8|8703439	19.2056
Chr8|9662321	20.3391
Chr8|10040308	20.8997
Chr8|10290335	21.4625
Chr8|11539437	22.0245
Chr8|11548826	22.3046
Chr8|12083088	22.5847
Chr8|13477482	23.1463
Chr8|14015839	23.9931
Chr8|15176502	24.273
Chr8|15326316	24.5528
Chr8|16259563	25.6849
Chr8|16349071	25.9646
Chr8|17092328	26.5268
Chr8|17200044	27.0887
Chr8|17266623	27.6512
Chr8|17870112	27.9308
Chr8|18085056	29.2228
Chr8|18085149	29.2228
Chr8|18288069	29.9102
Chr8|18676223	30.1901
Chr8|18828935	30.7524
Chr8|19204129	31.0326
Chr8|19225806	31.3126
Chr8|19232186	31.875
Chr8|19302864	32.1551
Chr8|20029271	32.4352
Chr8|21046364	32.9975
Chr8|21446702	33.5599
Chr8|21866145	33.8399
Chr8|22392469	34.1193
Chr8|22566263	36.1215
Chr8|22882669	36.4009
Chr8|23556117	36.6807
Chr8|24053012	37.813
Chr8|24234179	38.9452
Chr8|26257861	40.6551
Chr8|26257960	40.9342
Chr8|29171578	42.0655
Chr8|29222333	43.7761
Chr8|29231016	44.0556
Chr8|29231145	44.3356
Chr8|29611111	45.1778
Chr8|30289600	48.0728
Chr8|30552035	48.6342
Chr8|30675953	48.9138
Chr8|30676085	50.3356
Chr8|32268295	50.8977
Chr8|32268296	51.7446
Chr8|33156998	52.3072
Chr8|33970808	52.3072
Chr8|36929853	54.0195
Chr8|37171909	54.299
Chr8|39014232	54.8617
Chr8|39705382	55.1417
Chr8|39773733	55.7045
Chr8|40061201	55.9845
Chr8|40926681	56.5473
Chr8|41088072	56.8268
Chr8|42257155	58.2485
Chr8|42336989	58.5279
Chr8|42337008	59.3751
Chr8|42342946	59.655
Chr8|42343023	59.935
Chr8|42857619	60.7819
Chr8|42857718	61.6289
Chr8|43267641	61.9089
Chr8|44546413	62.1883
Chr8|44810503	64.1916
Chr8|45006634	67.6925
Chr8|45147911	69.1109
Chr8|45180010	69.39
Chr8|46309730	70.8112
Chr8|46494800	71.0909
Chr8|46496890	71.3711
Chr8|47988875	71.6492
Chr8|47990793	76.3616
Chr8|47990971	76.6396
Chr8|49320258	76.9193
Chr8|50515421	78.0512
Chr8|50916284	78.3287
Chr8|50917401	78.6087
Chr8|55133764	79.1687
Chr8|56352305	79.4465
Chr8|56352346	79.4465
Chr8|59038203	80.0064
Chr8|63898113	80.2864
Chr8|68417985	80.5666
Chr8|70021355	80.8467
Chr8|71525737	81.1245
Chr8|71525958	86.1345
Chr8|72227255	86.6947
Chr8|73046244	86.9748
Chr8|74304027	87.255
Chr8|74309158	87.5352
Chr8|74528741	87.8154
Chr8|74530377	88.0957
Chr8|74550706	88.3759
Chr8|74694778	88.6559
Chr8|74959794	89.2177
Chr8|75014994	90.9255
Chr8|75015058	92.3435
Chr8|75096293	92.6231
Chr8|75955390	92.9032
Chr8|77152765	93.1834
Chr8|80646212	93.4613
Chr8|82730263	93.7413
Chr8|83715556	94.3009
Chr8|93182450	95.1215
Chr9|87388	0.087388
Chr9|3162216	0.0873881
Chr9|3625647	0.367423
Chr9|4909063	0.929441
Chr9|4909089	1.20885
Chr9|6159485	2.8386
Chr9|6159514	2.8386
Chr9|6163965	3.47256
Chr9|7846352	5.18219
Chr9|7852964	6.30593
Chr9|8524255	9.48662
Chr9|8705513	9.76491
Chr9|9527396	10.8937
Chr9|9630434	12.8921
Chr9|10056249	13.1713
Chr9|10141791	13.729
Chr9|10436201	15.7336
Chr9|10557665	16.2899
Chr9|10995899	17.4232
Chr9|12400801	17.9807
Chr9|12408673	19.6905
Chr9|13168220	20.2522
Chr9|14533302	20.8133
Chr9|14533371	21.6598
Chr9|14669167	21.9397
Chr9|14770753	22.2199
Chr9|14796920	22.4998
Chr9|15024882	23.3458
Chr9|15306818	24.477
Chr9|15556497	24.7567
Chr9|16349002	25.3186
Chr9|19023580	25.8797
Chr9|19031301	28.7599
Chr9|21464031	31.0507
Chr9|21478392	32.1801
Chr9|23077131	32.7409
Chr9|23078788	33.3029
Chr9|25445307	33.583
Chr9|25947057	34.1437
Chr9|25956005	35.2772
Chr9|27755652	35.838
Chr9|27756262	36.118
Chr9|28182362	36.6744
Chr9|28617086	38.9699
Chr9|28617098	39.249
Chr9|28617118	39.5291
Chr9|28617150	40.0914
Chr9|28841770	40.3702
Chr9|28991525	43.2546
Chr9|29279002	43.5335
Chr9|29453351	44.0934
Chr9|30971963	45.5141
Chr9|31961440	46.9312
Chr9|32324831	48.6394
Chr9|32324874	50.3469
Chr9|32324930	51.479
Chr9|32324938	52.3247
Chr9|32324996	52.6026
Chr9|32325073	57.0298
Chr9|33022399	57.572
Chr9|33249480	58.1321
Chr9|35487198	59.554
Chr9|35487211	59.8336
Chr9|35650104	60.3956
Chr9|35675070	60.9583
Chr9|36030950	61.2384
Chr9|36031650	61.5168
Chr9|36068338	65.3059
Chr9|36113105	65.8663
Chr9|36114558	66.7123
Chr9|37154977	66.9922
Chr9|37154991	67.2716
Chr9|37157381	69.2698
Chr9|37192660	69.5489
Chr9|37203207	70.1111
Chr9|37358158	70.3911
Chr9|37358239	70.6711
Chr9|38815379	71.2331
Chr9|40289030	71.5126
Chr9|46127157	72.9306
Chr9|46128233	73.21
Chr9|46941023	73.7721
Chr9|49236067	73.7721
Chr9|49409567	74.0522
Chr9|51166722	74.3324
Chr9|51966835	74.6125
Chr9|52311952	74.8927
Chr9|52594597	75.1727
Chr9|52961895	75.7349
Chr9|53047777	76.0148
Chr9|55947931	76.295
Chr9|56418841	76.5751
Chr9|63145954	76.5751
Chr9|66416867	76.5751
Chr9|66611419	76.8542
Chr9|71547616	79.1433
Chr9|71550004	79.4225
Chr9|71550823	79.7027
Chr9|71579477	79.9814
Chr9|71899454	83.1727
Chr9|74570892	85.1824
Chr9|76361876	86.0276
Chr9|76363547	86.5896
Chr9|76364147	86.8695
Chr9|77265695	87.4316
Chr9|77267881	87.9938
Chr9|78926676	88.2735
Chr9|78926682	89.1196
Chr9|78926777	89.3995
Chr9|80898561	89.6795
Chr9|80900561	90.2417
Chr9|80900618	90.5206
Chr9|82175292	90.8003
Chr9|84247689	91.9303
Chr9|89664333	92.4921
Chr9|95643931	92.7715
Chr9|96701249	94.1886
Chr9|96701322	94.4682
Chr9|99600886	94.7475
Chr9|101171461	95.0276
Chr9|101176498	95.0276
Chr9|104940455	96.445
Chr9|113805788	96.7246
Chr9|119314621	97.0041
Chr9|119314720	98.4218
Chr9|121494785	99.5527
Chr9|124748487	99.8323
Chr9|125182165	100.395
Chr9|125214033	100.625
Chr10|3144	0.003144
Chr10|1021384	0.692642
Chr10|1146069	0.972319
Chr10|3003199	1.81866
Chr10|3131960	2.37995
Chr10|3201788	2.9419
Chr10|3208904	3.50385
Chr10|3306602	4.06587
Chr10|3372014	4.34523
Chr10|3372142	6.05208
Chr10|4045237	8.34339
Chr10|4219642	8.62232
Chr10|4221533	9.46741
Chr10|4674007	10.8851
Chr10|6145176	14.0726
Chr10|6145869	14.3508
Chr10|6164641	15.7724
Chr10|6250423	16.3324
Chr10|6652802	16.8947
Chr10|6654895	17.1748
Chr10|6725437	17.455
Chr10|6947228	17.7352
Chr10|7029209	18.2975
Chr10|7226932	18.8594
Chr10|8591380	19.4222
Chr10|8717616	19.9819
Chr10|9203945	21.4053
Chr10|9261601	21.9649
Chr10|9265615	22.5245
Chr10|9273956	28.8256
Chr10|9279260	29.1029
Chr10|10297541	29.3831
Chr10|10496492	29.6624
Chr10|10529152	31.6634
Chr10|10529193	31.9418
Chr10|12372005	34.2364
Chr10|12395568	35.0801
Chr10|13055831	35.6416
Chr10|13767501	35.9218
Chr10|14095806	36.2017
Chr10|14218312	37.0472
Chr10|14452957	38.1796
Chr10|14641723	38.4593
Chr10|14854795	39.0216
Chr10|16130465	39.3016
Chr10|16199848	39.8633
Chr10|16318285	40.1431
Chr10|18247688	40.9889
Chr10|18808172	41.2687
Chr10|19043816	41.8312
Chr10|20025126	42.3932
Chr10|20112015	42.6732
Chr10|21251916	43.2352
Chr10|21251956	43.7976
Chr10|22020127	44.3598
Chr10|23094036	44.6398
Chr10|23113400	44.9199
Chr10|25870233	45.4821
Chr10|26270565	45.7622
Chr10|26971047	46.0423
Chr10|26976073	46.6046
Chr10|27769515	46.8847
Chr10|27831131	47.1645
Chr10|28157607	48.2963
Chr10|29209017	48.8576
Chr10|30057843	49.1374
Chr10|32608654	49.983
Chr10|33859880	50.2628
Chr10|34146679	50.8251
Chr10|36490602	51.1051
Chr10|37078610	51.3853
Chr10|38088472	51.6655
Chr10|38704444	51.9456
Chr10|41790297	52.2258
Chr10|42977638	52.506
Chr10|43611371	52.7862
Chr10|44853788	53.0664
Chr10|45720542	53.3466
Chr10|45974940	53.6268
Chr10|46292294	53.907
Chr10|46645525	54.1872
Chr10|46645606	54.4672
Chr10|47309966	55.0297
Chr10|47310082	55.3098
Chr10|48185845	55.59
Chr10|48187852	55.8702
Chr10|49653778	56.1504
Chr10|49974328	56.4306
Chr10|50096451	56.7107
Chr10|50870545	57.2732
Chr10|50876443	57.5531
Chr10|51022350	58.1156
Chr10|51055451	58.3955
Chr10|52012004	58.958
Chr10|52989376	59.2378
Chr10|55239821	60.0842
Chr10|55748884	60.6465
Chr10|55748891	60.9266
Chr10|56913663	61.2068
Chr10|56914885	61.487
Chr10|57502674	61.7671
Chr10|58226700	62.3296
Chr10|60120930	62.6097
Chr10|60170524	62.8899
Chr10|60170547	63.1701
Chr10|60423112	63.4502
Chr10|61085022	64.0126
Chr10|64509765	64.575
Chr10|64605422	64.8549
Chr10|64605526	65.4175
Chr10|64642095	65.6975
Chr10|65728663	66.2599
Chr10|66309084	66.8224
Chr10|66870427	67.1025
Chr10|67418798	67.3827
Chr10|67602194	67.6629
Chr10|68323591	67.9432
Chr10|70930965	68.2233
Chr10|71098427	68.7857
Chr10|71103735	69.0657
Chr10|72077101	69.6276
Chr10|72270361	71.0471
Chr10|72292782	71.609
Chr10|76446044	71.8891
Chr10|77137552	72.1693
Chr10|78436795	72.4494
Chr10|78437846	73.0119
Chr10|78438011	73.292
Chr10|79607698	73.5722
Chr10|80443632	73.8524
Chr10|80678050	74.1327
Chr10|81650311	74.4129
Chr10|82283684	74.6932
Chr10|82897322	74.9727
Chr10|84007392	76.6831
Chr10|84670322	77.5294
Chr10|84777672	77.8092
Chr10|84794362	78.3711
Chr10|85719410	80.3762
Chr10|85719425	80.6557
Chr10|86186776	80.9359
Chr10|86186887	81.4986
Chr10|87443741	81.7789
Chr10|87819327	82.0592
Chr10|88235928	82.3395
Chr10|88236731	82.6198
Chr10|89556553	82.9001
Chr10|89567833	83.1805
Chr10|91028166	83.4608
Chr10|93006853	83.7411
Chr10|93430136	84.0214
Chr10|94710154	84.3017
Chr10|96032239	84.582
Chr10|97050004	84.8623
Chr10|97362889	85.1427
Chr10|99239647	85.4228
Chr10|100013453	85.9857
Chr10|100013614	86.2659
Chr10|100014076	86.5462
Chr10|102340492	86.8264
Chr10|102879665	87.3893
Chr10|104585554	87.6694
Chr10|105378273	87.9498
Chr10|105447035	88.2301
Chr10|106952447	88.5104
Chr10|107553377	88.7907
Chr10|108104180	89.0708
Chr10|109693430	89.6334
Chr10|110147783	90.4807
Chr10|110683418	90.7604
Chr10|110749129	91.608
Chr10|110760945	91.8879
Chr10|112447162	92.4508
Chr10|112561351	92.7309
Chr10|113245853	93.2938
Chr10|113754469	93.5739
Chr10|114046733	93.8542
Chr10|114268209	94.4041
Chr10|115320092	97.9162
Chr10|117183378	98.1949
Chr10|118970279	98.4752
Chr10|118970435	98.7555
Chr10|120374631	99.0357
Chr10|120412068	99.316
Chr10|120689749	99.5963
Chr10|122586456	99.8766
Chr10|123505679	100.157
Chr10|123513074	100.437
Chr10|123553059	100.718
Chr10|124262570	100.998
Chr10|125081379	101.278
Chr10|125182673	101.558
Chr10|125505794	101.839
Chr10|125508735	102.119
Chr10|125767655	102.399
Chr10|127289626	102.68
Chr10|127866124	103.243
Chr10|128119633	103.523
Chr10|128974891	103.803
Chr10|129106982	104.083
Chr10|129537400	104.364
Chr10|130175068	104.644
Chr10|130186697	104.924
Chr10|131712877	105.205
Chr10|134018645	105.767
Chr10|134351611	106.047
Chr10|134803695	106.328
Chr10|137288258	106.608
Chr10|137745734	106.888
Chr10|138766162	107.168
Chr10|139598394	108.016
Chr10|141346495	108.296
Chr10|141809504	108.574
Chr10|142480935	108.854
Chr10|143079531	109.415
Chr10|143184110	109.695
Chr10|143928330	109.975
Chr10|144224435	110.256
Chr10|145112684	110.536
Chr10|146224781	111.099
Chr10|146461119	111.379
Chr10|146746093	111.942
Chr10|147544576	112.504
Chr10|147864138	112.784
Chr10|150327255	113.918
Chr10|150622212	114.198
Chr10|150622578	114.479
Chr10|151052192	114.759
Chr10|151651754	115.035
Chr10|153174569	115.315
Chr10|154160309	115.591
Chr10|155837252	115.871
Chr10|155837376	116.151
Chr10|156028646	116.714
Chr10|159548020	116.994
Chr10|160915632	117.557
Chr10|161300527	117.837
Chr10|161881133	118.067
Chr11|80537	0.080537
Chr11|1102380	0.0805371
Chr11|2239726	0.637904
Chr11|2254732	1.19851
Chr11|3741931	2.3315
Chr11|3958949	2.89217
Chr11|4097186	3.17198
Chr11|4097289	4.01824
Chr11|4660497	4.57958
Chr11|4664343	4.8594
Chr11|5824503	5.70525
Chr11|6414768	5.98485
Chr11|6526982	6.83077
Chr11|6566312	7.11056
Chr11|7179089	7.67262
Chr11|7262672	8.23461
Chr11|7345014	8.79659
Chr11|8500490	9.35792
Chr11|8678358	10.2006
Chr11|9571722	12.7884
Chr11|9571818	14.2042
Chr11|10723463	16.4966
Chr11|11587245	17.6265
Chr11|11607805	17.9017
Chr11|12259642	27.5285
Chr11|12259700	29.2151
Chr11|12390359	29.4946
Chr11|14576974	30.0569
Chr11|14580331	30.6191
Chr11|15460096	31.1814
Chr11|15460426	31.461
Chr11|16136793	32.8754
Chr11|16144023	37.91
Chr11|16144546	39.0344
Chr11|16636159	39.3132
Chr11|18101219	41.6064
Chr11|18101332	44.4928
Chr11|18101372	45.9118
Chr11|18101438	46.7579
Chr11|18996449	47.0377
Chr11|19866726	47.5997
Chr11|23690329	48.1625
Chr11|23700872	48.7212
Chr11|23793186	50.435
Chr11|24010188	50.9907
Chr11|25073843	52.7009
Chr11|25227644	54.7006
Chr11|27429405	54.9799
Chr11|30061088	55.5421
Chr11|30072712	56.1043
Chr11|31222122	56.3837
Chr11|32234000	58.0921
Chr11|32246654	59.1742
Chr11|32246663	59.1742
Chr11|33254813	59.5015
Chr11|34102763	59.7816
Chr11|34103136	60.0608
Chr11|34725053	60.9052
Chr11|37258815	62.6159
Chr11|37623853	63.1748
Chr11|39675507	63.4546
Chr11|39815874	64.3004
Chr11|40239701	65.4321
Chr11|40720347	65.7107
Chr11|40722122	68.3015
Chr11|42140196	69.4312
Chr11|42572361	70.2773
Chr11|43317161	71.1232
Chr11|43875391	72.2553
Chr11|44058681	73.1015
Chr11|44065002	73.3813
Chr11|44948844	73.9438
Chr11|44988079	74.2239
Chr11|45011566	74.5041
Chr11|46324602	74.7843
Chr11|46347013	75.0645
Chr11|46428837	75.3446
Chr11|46439013	75.907
Chr11|47984577	76.187
Chr11|48012445	76.7494
Chr11|48013630	77.0294
Chr11|48058389	77.3086
Chr11|49363961	79.6027
Chr11|49363979	79.8819
Chr11|49364117	80.1621
Chr11|49585326	80.4416
Chr11|49639945	82.1508
Chr11|49734944	83.8605
Chr11|52684978	84.4214
Chr11|52708947	86.1315
Chr11|52709058	86.411
Chr11|54455742	86.6911
Chr11|54455813	87.2536
Chr11|56004251	87.5335
Chr11|56323739	88.096
Chr11|56325138	88.3761
Chr11|56459345	88.6563
Chr11|56663898	88.9365
Chr11|56783124	89.2164
Chr11|58073356	90.0632
Chr11|58085532	90.3431
Chr11|61003842	90.6233
Chr11|61007854	90.9014
Chr11|61814175	95.6072
Chr11|61820769	95.6072
Chr11|64239115	95.6072
Chr11|64310091	96.4529
Chr11|64677189	97.2988
Chr11|64677294	97.861
Chr11|67107113	98.1406
Chr11|67140280	99.2725
Chr11|67776702	100.118
Chr11|68271081	100.681
Chr11|68836209	100.961
Chr11|70074819	101.241
Chr11|70863040	101.521
Chr11|71659262	101.801
Chr11|71662003	102.933
Chr11|73784884	103.213
Chr11|77681760	104.345
Chr11|79398536	104.624
Chr11|79398659	105.471
Chr11|81811953	106.033
Chr11|81820719	106.313
Chr11|84024214	106.593
Chr11|85098995	107.155
Chr11|85572249	107.435
Chr11|86153975	107.716
Chr11|86456939	107.996
Chr11|87133839	108.276
Chr11|89019076	108.556
Chr11|89177098	108.836
Chr11|90669061	109.117
Chr11|91383571	109.397
Chr11|91957797	109.674
Chr11|94864235	110.807
Chr11|94864401	111.367
Chr11|96099475	111.647
Chr11|100099405	112.208
Chr11|101375616	114.503
Chr11|103895273	114.732
Chr12|47761	0.047761
Chr12|1152551	0.868568
Chr12|1423828	1.14841
Chr12|1920739	1.42848
Chr12|2269804	1.99051
Chr12|2310961	2.55179
Chr12|2332348	3.39788
Chr12|2332658	4.2436
Chr12|3008240	4.5235
Chr12|3008330	4.80327
Chr12|3141024	5.9344
Chr12|3385030	7.06645
Chr12|4365545	7.62576
Chr12|4365603	8.7592
Chr12|5523264	9.31915
Chr12|6072234	10.1657
Chr12|6072269	10.4927
Chr12|6072326	10.4927
Chr12|6324443	11.5766
Chr12|7137464	12.1375
Chr12|7137789	12.4167
Chr12|8165097	14.4151
Chr12|8487615	14.6943
Chr12|8487673	15.2566
Chr12|8487745	15.5367
Chr12|10060342	15.8168
Chr12|10079302	16.0966
Chr12|10119812	17.2294
Chr12|10666833	17.788
Chr12|11963782	19.2088
Chr12|12881861	19.7686
Chr12|14240093	22.0598
Chr12|14469365	22.6197
Chr12|15639848	23.4662
Chr12|15653577	24.0276
Chr12|15706298	24.3076
Chr12|15706396	24.8698
Chr12|15847113	25.1497
Chr12|19133336	25.9957
Chr12|19133455	25.9957
Chr12|22858660	26.8417
Chr12|23224078	27.1215
Chr12|23295169	27.683
Chr12|23302181	28.5296
Chr12|23302195	28.809
Chr12|23553783	30.228
Chr12|24472690	31.3591
Chr12|24472814	31.9204
Chr12|24700311	32.1997
Chr12|27016349	33.9075
Chr12|27964364	35.0379
Chr12|29750021	35.3174
Chr12|34071058	36.1638
Chr12|34171747	36.7251
Chr12|34927658	37.2871
Chr12|35040951	37.5672
Chr12|35716702	37.8473
Chr12|35847690	38.4093
Chr12|36547416	38.9713
Chr12|37528116	39.5334
Chr12|37550405	39.8135
Chr12|37553014	40.0936
Chr12|38041166	40.6558
Chr12|39020661	40.9359
Chr12|39547203	41.216
Chr12|39798886	41.7782
Chr12|39876553	42.0583
Chr12|39946725	42.3384
Chr12|40385078	42.6186
Chr12|40391026	42.8988
Chr12|40539551	43.179
Chr12|41718382	43.4592
Chr12|42036094	43.7392
Chr12|43031124	44.3016
Chr12|43569801	44.5814
Chr12|44756360	45.4277
Chr12|46319768	45.7075
Chr12|47267719	46.2698
Chr12|47323572	46.5499
Chr12|49488807	46.83
Chr12|50009314	47.1102
Chr12|50249063	47.3902
Chr12|52026335	48.2365
Chr12|53223728	48.5164
Chr12|53519498	48.7966
Chr12|54329105	49.0768
Chr12|56666422	49.3547
Chr12|58172386	49.6348
Chr12|59055904	50.1949
Chr12|59345587	50.475
Chr12|60130356	50.7551
Chr12|60799510	51.0353
Chr12|60810974	51.3155
Chr12|60811064	51.5957
Chr12|60889226	51.8759
Chr12|61820360	52.4378
Chr12|62096925	53.0002
Chr12|63379574	53.562
Chr12|64410524	53.8416
Chr12|66148739	54.9692
Chr12|67828788	58.4627
Chr12|67835298	59.8778
Chr12|67942528	61.0095
Chr12|68300222	61.5717
Chr12|68455871	61.8517
Chr12|70045657	62.1312
Chr12|70120526	63.8432
Chr12|70380761	64.4022
Chr12|71797195	64.6823
Chr12|71800500	64.9625
Chr12|72197898	65.2427
Chr12|72210584	65.5223
Chr12|72226293	66.9414
Chr12|72231729	69.2371
Chr12|72232058	70.0797
Chr12|76485618	71.2118
Chr12|78003387	72.0571
Chr12|80699884	73.4773
Chr12|82416787	74.0364
Chr12|82416803	74.8829
Chr12|83370083	75.1624
Chr12|83374850	76.0082
Chr12|90511356	76.0082
Chr12|97033004	76.2882
Chr12|97674679	76.85
Chr12|100407311	77.1295
Chr12|100445239	78.5468
Chr12|101283830	81.7294
Chr12|101294982	81.9581
Chr13|1385	0.001385
Chr13|1183772	0.230954
Chr13|1498609	1.64763
Chr13|1660391	2.49322
Chr13|1665821	3.3375
Chr13|3508549	4.75654
Chr13|4174780	5.03614
Chr13|4599035	5.31573
Chr13|7145393	6.73445
Chr13|7148381	7.01399
Chr13|9228065	7.57617
Chr13|9258817	7.85627
Chr13|9691734	8.13619
Chr13|11123557	8.9887
Chr13|11132209	8.9887
Chr13|12383826	16.8895
Chr13|12388287	17.1658
Chr13|12705671	17.7282
Chr13|13177543	18.5747
Chr13|13199246	18.8546
Chr13|13581878	19.417
Chr13|13591957	19.9793
Chr13|13738317	20.5079
Chr13|14831344	26.2471
Chr13|15452725	26.7639
Chr13|15453051	29.9623
Chr13|15457126	30.241
Chr13|15460242	30.8034
Chr13|15565217	31.0835
Chr13|16116925	31.3633
Chr13|19030852	32.4951
Chr13|19170763	33.9142
Chr13|20409967	34.1938
Chr13|27450726	34.474
Chr13|29244997	34.7541
Chr13|33627549	35.0336
Chr13|33814982	36.7423
Chr13|36632112	37.0217
Chr13|36811192	37.584
Chr13|36811300	37.8641
Chr13|38114356	38.4241
Chr13|41714149	39.8447
Chr13|43168395	40.1243
Chr13|45428598	40.4036
Chr13|45562165	40.6838
Chr13|46091953	40.964
Chr13|46769930	41.2394
Chr13|47130480	42.0858
Chr13|49275972	42.3612
Chr13|52940789	42.6414
Chr13|54003628	42.9216
Chr13|54024085	43.2018
Chr13|54258562	43.482
Chr13|54427728	43.7623
Chr13|54811995	44.0425
Chr13|54974129	44.3226
Chr13|57798792	44.885
Chr13|58502152	45.4473
Chr13|58850567	45.7271
Chr13|58853414	46.5735
Chr13|60880717	47.1356
Chr13|62522994	47.4156
Chr13|63469285	47.9775
Chr13|64367822	48.5398
Chr13|64417401	49.3861
Chr13|67748806	49.6659
Chr13|68183860	50.228
Chr13|68194783	51.0736
Chr13|68589863	53.0738
Chr13|69178678	53.3531
Chr13|70062255	53.6333
Chr13|70273519	53.9132
Chr13|70394862	54.7596
Chr13|71743748	55.3216
Chr13|71800266	55.884
Chr13|77155002	56.1641
Chr13|79227093	56.4443
Chr13|80810629	56.7245
Chr13|81719368	57.0042
Chr13|82568431	58.4244
Chr13|82603951	58.9864
Chr13|83893901	59.2665
Chr13|83991578	59.5467
Chr13|84654052	59.8269
Chr13|84894986	60.3893
Chr13|86107750	60.6693
Chr13|86215800	61.2317
Chr13|86523239	61.794
Chr13|87085839	62.356
Chr13|87091508	63.4875
Chr13|87103373	65.7824
Chr13|87309293	66.0609
Chr13|87309419	67.7712
Chr13|87310199	68.3332
Chr13|88871595	68.8954
Chr13|89296408	69.4578
Chr13|91905551	69.7338
Chr13|95434896	78.3604
Chr13|95437281	79.7775
Chr13|95442550	80.0565
Chr13|95860992	81.7676
Chr13|100733343	82.3286
Chr13|102026696	84.6235
Chr13|102027229	88.1147
Chr13|102027321	88.9598
Chr13|102027329	89.5219
Chr13|104127914	90.3688
Chr13|105531661	90.6487
Chr13|107046777	90.9288
Chr13|107541563	91.4913
Chr13|107543047	92.0536
Chr13|108271272	92.6159
Chr13|108909115	92.896
Chr13|109816650	93.1761
Chr13|112504935	93.7386
Chr13|112505026	94.0187
Chr13|112579740	94.2942
Chr13|113374452	94.8567
Chr13|115328882	95.1318
Chr13|116302378	96.2644
Chr13|116311288	96.5441
Chr13|116578483	96.8244
Chr13|119240516	97.0546
Chr14|99118	0.099118
Chr14|5710373	5.64638
Chr14|8064145	15.298
Chr14|8250082	15.7545
Chr14|8910796	16.0955
Chr14|9041869	28.3317
Chr14|9042594	34.5532
Chr14|9042668	34.5532
Chr14|11103295	35.409
Chr14|11412452	36.2547
Chr14|12045793	36.5346
Chr14|12090454	36.8145
Chr14|12335212	37.6592
Chr14|14213934	39.0802
Chr14|14896105	39.6399
Chr14|15324812	40.202
Chr14|15537586	40.4821
Chr14|17748879	40.7622
Chr14|19578045	41.0424
Chr14|21122134	41.3225
Chr14|21123967	41.6027
Chr14|25186320	41.8829
Chr14|25187636	42.161
Chr14|25734819	46.553
Chr14|25750230	47.1134
Chr14|25776821	47.3923
Chr14|25784279	49.0975
Chr14|28001351	51.9783
Chr14|28155712	53.1086
Chr14|31429610	53.6705
Chr14|45853612	53.9503
Chr14|47730694	54.7965
Chr14|47730907	55.0759
Chr14|57064331	56.4951
Chr14|64195713	56.774
Chr14|64329380	56.774
Chr14|68947437	58.4807
Chr14|68947458	58.7596
Chr14|68947544	60.1804
Chr14|68949164	60.7403
Chr14|70009316	61.0204
Chr14|70027165	61.3
Chr14|70036269	62.7159
Chr14|70449089	65.8949
Chr14|73246277	65.8949
Chr14|75334456	66.1751
Chr14|76177903	66.4549
Chr14|77229016	67.5866
Chr14|78059080	67.8664
Chr14|78076760	68.1465
Chr14|78537612	68.4267
Chr14|78542271	68.7068
Chr14|79281180	68.987
Chr14|79298161	69.2671
Chr14|79519671	69.5468
Chr14|80635462	70.6783
Chr14|80674430	70.9581
Chr14|80709177	71.2336
Chr14|83516970	71.7959
Chr14|84095124	72.0714
Chr14|86670555	72.3512
Chr14|86670565	73.4827
Chr14|86670699	73.7624
Chr14|86971198	74.0426
Chr14|92329098	74.3227
Chr14|93879079	74.6028
Chr14|93879137	74.883
Chr14|95670689	75.1631
Chr14|97890214	75.4431
Chr14|98214381	76.0053
Chr14|98371394	76.2853
Chr14|99514567	76.5655
Chr14|99561441	76.8453
Chr14|104777308	77.6913
Chr14|104790858	77.9712
Chr14|105714505	78.251
Chr14|105727345	79.0971
Chr14|108399475	79.377
Chr14|109115706	79.657
Chr14|109123333	80.2193
Chr14|110710020	80.4993
Chr14|111484473	80.7795
Chr14|111816609	81.0597
Chr14|112434002	81.3396
Chr14|112768813	82.1856
Chr14|112904592	82.4652
Chr14|112906363	83.3112
Chr14|112920438	83.5908
Chr14|114377835	84.4367
Chr14|114388871	84.9985
Chr14|115251023	85.8445
Chr14|115360544	86.1239
Chr14|115362010	87.5434
Chr14|117225630	87.8231
Chr14|117225778	88.0532
Chr15|294	0.000294
Chr15|1096284	1.39422
Chr15|1322466	1.67368
Chr15|1413499	2.23598
Chr15|2252829	2.51562
Chr15|2595097	3.64843
Chr15|2660589	4.20928
Chr15|3031348	4.48939
Chr15|3033525	4.76956
Chr15|3045600	5.04917
Chr15|3785517	6.46856
Chr15|4093229	7.31296
Chr15|5659696	8.44433
Chr15|5934964	9.57668
Chr15|6582879	10.1331
Chr15|6603280	12.1396
Chr15|7092960	12.6974
Chr15|7331308	12.9773
Chr15|8071352	13.8238
Chr15|8175910	14.3853
Chr15|9194047	14.9474
Chr15|9264839	15.2273
Chr15|10137014	16.0732
Chr15|10137081	16.0732
Chr15|11278718	16.9189
Chr15|11447178	17.7639
Chr15|12152916	19.1854
Chr15|13462659	19.7439
Chr15|14078504	20.8779
Chr15|14093324	21.4364
Chr15|14464255	22.8579
Chr15|14769275	23.1375
Chr15|15049157	23.4177
Chr15|15228436	23.6975
Chr15|17576986	24.8298
Chr15|17577655	25.1096
Chr15|17916788	25.3895
Chr15|17921449	26.4113
Chr15|17921714	26.4113
Chr15|18522668	27.9435
Chr15|19159412	28.5032
Chr15|19620455	28.7831
Chr15|21106159	29.6294
Chr15|22418806	29.9092
Chr15|23140314	30.4714
Chr15|24493428	31.0335
Chr15|24965093	31.5935
Chr15|25127772	33.0148
Chr15|26318383	33.2944
Chr15|26417223	33.5745
Chr15|26430622	34.1368
Chr15|27867506	34.699
Chr15|29770330	34.9791
Chr15|33006648	35.2593
Chr15|33161845	35.538
Chr15|35189766	35.8179
Chr15|36117728	36.6618
Chr15|37838392	36.9414
Chr15|39381486	37.7865
Chr15|39384662	37.7865
Chr15|42779529	38.6325
Chr15|42994053	38.9125
Chr15|44987271	39.1927
Chr15|44987285	39.4727
Chr15|45161838	40.0352
Chr15|45346538	40.5957
Chr15|51643070	41.7286
Chr15|54649780	42.008
Chr15|55103360	43.1399
Chr15|55186590	43.4197
Chr15|55284289	43.6999
Chr15|55384573	43.9799
Chr15|55384666	44.5422
Chr15|60488111	44.8219
Chr15|64283493	45.9538
Chr15|66871647	46.2336
Chr15|67247404	46.5137
Chr15|68175508	46.7938
Chr15|70967929	47.3562
Chr15|70968057	47.6362
Chr15|71161713	47.9163
Chr15|72184099	48.4788
Chr15|74676061	49.0393
Chr15|75860389	50.1734
Chr15|76435440	50.7342
Chr15|76718657	51.2964
Chr15|78849813	51.5759
Chr15|79090237	52.9976
Chr15|79128671	53.5562
Chr15|79252212	54.6893
Chr15|79364849	55.535
Chr15|82203924	55.8148
Chr15|82206969	56.3764
Chr15|82207084	57.223
Chr15|85390893	57.5023
Chr15|86056285	59.2128
Chr15|86067652	60.6334
Chr15|86072970	61.1891
Chr15|86073064	63.1981
Chr15|86073894	63.7558
Chr15|86100188	64.3186
Chr15|88761428	64.8804
Chr15|90328104	65.4432
Chr15|90563420	65.7232
Chr15|90564991	66.0035
Chr15|90650135	66.2827
Chr15|95255109	68.577
Chr15|95627102	69.4225
Chr15|97246952	69.7023
Chr15|97740651	70.2625
Chr15|99129178	70.5426
Chr15|101405290	70.7706
Chr16|6750	0.00675
Chr16|1382322	0.272027
Chr16|1801111	0.552149
Chr16|2150144	0.832285
Chr16|2161309	1.11242
Chr16|2383309	1.39249
Chr16|2445946	1.95319
Chr16|3193715	3.08536
Chr16|3509436	3.93066
Chr16|3990621	4.20999
Chr16|4389686	5.63027
Chr16|5050549	6.19012
Chr16|5097513	6.47014
Chr16|5417034	7.03229
Chr16|5899850	7.31238
Chr16|6851995	7.59185
Chr16|7375293	9.28725
Chr16|7907487	16.2829
Chr16|9480610	16.7838
Chr16|9482095	19.6772
Chr16|10393038	21.6745
Chr16|10403869	23.3816
Chr16|10403950	23.6609
Chr16|10405447	24.2233
Chr16|10899699	24.772
Chr16|11228707	28.3307
Chr16|11228835	28.3307
Chr16|12676917	31.1504
Chr16|12956635	31.7041
Chr16|12966391	32.2662
Chr16|13852852	32.5462
Chr16|14415243	33.1027
Chr16|15579738	35.4038
Chr16|15938580	35.96
Chr16|15943881	36.5225
Chr16|15946615	36.8021
Chr16|18567847	37.9352
Chr16|19730235	38.4953
Chr16|21307710	39.3407
Chr16|21519313	40.7608
Chr16|36607014	41.0362
Chr16|36854245	49.9411
Chr16|36854334	50.217
Chr16|37375502	50.4971
Chr16|38008274	51.0592
Chr16|38683340	51.339
Chr16|41971666	52.1848
Chr16|41971684	53.0302
Chr16|42094411	54.1626
Chr16|42641909	54.7232
Chr16|43467594	55.0032
Chr16|44790816	55.5655
Chr16|45000159	55.8455
Chr16|45005246	56.1255
Chr16|45096665	56.6878
Chr16|50301604	56.9677
Chr16|51670048	57.5301
Chr16|51707918	57.8097
Chr16|52053826	58.9415
Chr16|52068327	59.2212
Chr16|57217960	59.5005
Chr16|57219656	61.4987
Chr16|58742902	62.2332
Chr16|61439053	67.7469
Chr16|62163862	68.0245
Chr16|67340934	68.3047
Chr16|67350192	68.8667
Chr16|72430532	69.4284
Chr16|72437399	71.4295
Chr16|72437463	71.7089
Chr16|72482981	71.9845
Chr16|72483053	81.4986
Chr16|76726459	81.9536
Chr16|78117583	84.8439
Chr16|89346005	88.9358
Chr16|92377766	89.4961
Chr16|93246655	90.0583
Chr16|93248390	90.3378
Chr16|94692209	91.4693
Chr16|98239234	91.749
Chr16|100019340	92.0292
Chr16|100491261	92.0292
Chr16|105386814	93.16
Chr16|105387464	93.7218
Chr16|105388294	94.0016
Chr16|109771708	94.7972
Chr17|547	0.000547
Chr17|2173109	0.230589
Chr17|2286565	0.767815
Chr17|2733654	5.18133
Chr17|3507583	6.288
Chr17|4075576	11.3009
Chr17|4075590	15.0891
Chr17|5480440	15.6364
Chr17|5497305	15.9162
Chr17|5899115	16.7625
Chr17|5902539	17.3206
Chr17|6313270	19.0277
Chr17|6313346	21.6194
Chr17|7041639	22.1675
Chr17|8157519	24.6887
Chr17|8157759	24.6887
Chr17|8160071	25.3171
Chr17|8781258	25.5972
Chr17|9690672	25.8773
Chr17|10153725	26.1568
Chr17|10338229	27.865
Chr17|10514743	28.1439
Chr17|12094970	29.5632
Chr17|12312925	29.8426
Chr17|13875135	30.6892
Chr17|14069200	31.2498
Chr17|15712658	32.1205
Chr17|15715806	32.1205
Chr17|17778127	38.0575
Chr17|19352178	41.5344
Chr17|19357455	41.8129
Chr17|19357867	42.3749
Chr17|19362696	42.9341
Chr17|19369413	44.5713
Chr17|23625181	49.828
Chr17|26820254	50.1057
Chr17|26820308	50.3859
Chr17|27581021	50.6659
Chr17|27583308	51.2281
Chr17|27616159	51.5081
Chr17|28076021	51.7878
Chr17|30754073	52.919
Chr17|30754220	54.0502
Chr17|30776970	54.6117
Chr17|34190314	56.0311
Chr17|34202756	56.3108
Chr17|34202883	56.5907
Chr17|39698889	57.4368
Chr17|41204722	58.5685
Chr17|42755044	59.4133
Chr17|43021050	60.5452
Chr17|44101162	60.825
Chr17|44598767	61.1051
Chr17|45027888	61.3853
Chr17|45113568	61.6654
Chr17|45367417	62.2278
Chr17|45514898	62.5078
Chr17|46067597	62.7879
Chr17|49437939	63.3503
Chr17|50360213	63.6303
Chr17|52355152	63.9105
Chr17|52609933	64.1907
Chr17|52691262	64.4708
Chr17|52782991	65.0331
Chr17|54557790	65.5954
[truncated: 123 more rows]
