# Supplementary material for: Genetic Architecture of Capitate Glandular Trichome Density in Florets of Domesticated Sunflower (Helianthus annuus L.)
Source: PubMed Central journal article supplement (PMC5767279; doi:10.3389/fpls.2017.02227), 2018-01-09
Supplement: Table2.pdf [file Table2.pdf]

Table S2. Maximum LOD values for each chromosome from the one QTL scan in the F<sub>4</sub> mapping population of HA 300 x RHA 464.

| Chromosome | Position (cM) | LOD  |
|------------|---------------|------|
| 1          | 15.93         | 0.52 |
| 2          | 28.38         | 0.67 |
| 3          | 0.62          | 1.93 |
| 4          | 56.59         | 1.16 |
| 5          | 14.64         | 5.02 |
| 6          | 60.72         | 5.98 |
| 7          | 4.77          | 0.63 |
| 8          | 22.02         | 2.34 |
| 9          | 61.24         | 1.67 |
| 10         | 76.68         | 1.20 |
| 11         | 40.98         | 1.15 |
| 12         | 52.05         | 1.01 |
| 13         | 5.04          | 2.64 |
| 14         | 18.10         | 1.08 |
| 15         | 57.50         | 0.87 |
| 16         | 68.61         | 1.47 |
| 17         | 72.63         | 2.03 |
