# Supplementary material for: Genetic Architecture of Capitate Glandular Trichome Density in Florets of Domesticated Sunflower (Helianthus annuus L.)
Source: PubMed Central journal article supplement (PMC5767279; doi:10.3389/fpls.2017.02227), 2018-01-09
Supplement: Table4.pdf [file Table4.pdf]

Table S4. Sequences of two significant SNP markers identified in the HA 300 × RHA 464 mapping population.

| SNP marker   | Allele           | Map position (cM) | SNP sequence                                                                                                                                                            |
|--------------|------------------|-------------------|-------------------------------------------------------------------------------------------------------------------------------------------------------------------------|
| Ha5_11356218 | C/T <sup>a</sup> | 14.6              | AGTGGCTTTCACATATGGTCATAAAGTTCTAAT<br>ACTTCTTGGGAGATCTTTTCTGTTACTAATC[C/T]<br>TTTCATCTGCAACTGACTATTTGGACAGTGAATT<br>CTATTCGGTACTCAGCTGATAATAATGTTTATA<br>CCATAGTAGTTGAAC |
| Ha6_8364901  | T/C <sup>a</sup> | 60.5              | TTTAAATGTCCACTTGCTTTGAACAACACTCCAT<br>GGCCTGCGGTACC[T/C]TTTAGATACCTTAGAAT<br>TCTCTGAGCAGCTTCCATGTGGGCAACTTGCGG<br>TTGGTGCATAAACTGACTTACCACTCC                           |

<sup>a</sup>The first allele is from HA 300 and the second allele is from RHA 464.
